# Supplementary material for: Molecular Profiling of Patients with Pancreatic Cancer: Initial Results from the Know Your Tumor Initiative
Source: Oxford University Press journal article supplement (doi:10.1158/1078-0432.ccr-18-0531), 2018-06-28
Supplement: 10780432ccr180531-sup-197126_3_supp_4814775_p82fkv.xlsx [file 10780432ccr180531-sup-197126_3_supp_4814775_p82fkv.xlsx]

## Sheet: Table S1A (FoundationOne Genes)
ABL1
ABL2
ACVR1B
AKT1
AKT2
AKT3
ALK
AMER1
APC
AR
ARAF
ARFRP1
ARID1A
ARID1B
ARID2
ASXL1
ATM
ATR
ATRX
AURKA
AURKB
AXIN1
AXL
BAP1
BARD1
BCL2
BCL2L1
BCL2L2
BCOR
BCORL1
BLM
BRAF
BRCA1
BRCA2
BRD4
BRIP1
BTG1
BTK
CARD11
CBFB
CBL
CCND1
CCND2
CCND3
CCNE1
CD274
CD79A
CD79B
CDC73
CDH1
CDK12
CDK4
CDK6
CDK8
CDKN1A
CDKN1B
CDKN2A
CDKN2B
CDKN2C
CEBPA
CHD2
CHD4
CHEK1
CHEK2
CIC
CREBBP
CRKL
CRLF2
CSF1R
CTCF
CTNNA1
CTNNB1
CUL3
CYLD
DAXX
DDR2
DICER1
DNMT3A
DOT1L
EGFR
EMSY
EP300
EPHA3
EPHA5
EPHA7
EPHB1
ERBB2
ERBB3
ERBB4
ERG
ERRFI1
ESR1
EZH2
FAM46C
FANCA
FANCC
FANCD2
FANCE
FANCF
FANCG
FANCL
FAS
FAT1
FBXW7
FGF10
FGF14
FGF19
FGF23
FGF3
FGF4
FGF6
FGFR1
FGFR2
FGFR3
FGFR4
FH
FLCN
FLT1
FLT1
FLT4
FOXL2
FOXP1
FRS2
FUBP1
GABRA6
GATA1
GATA2
GATA3
GATA4
GATA6
GID4
GLI1
GNA11
GNA13
GNAQ
GNAS
GPR124
GRIN2A
GRM3
GSK3B
H3F3A
HGF
HNF1A
HRAS
HSD3B1
HSP90AA1
IDH1
IDH2
IGF1R
IGF2
IKBKE
IKZF1
IL7R
INHBA
INPP4B
IRF2
IRF4
IRS2
JAK1
JAK2
JAK3
JUN
KAT6A
KDM5A
KDM5C
KDM6A
KDR
KEAP1
KEL
KIT
KLHL6
KMT2A
KMT2C
KMT2D
KRAS
LMO1
LRP1B
LYN
LZTR1
MAGI2
MAP2K1
MAP2K2
MAP2K4
MAP3K1
MCL1
MDM2
MDM4
MED12
MEF2B
MEN1
MET
MITF
MLH1
MPL
MRE11A
MSH2
MSH6
MTOR
MUTYH
MYC
MYCL
MYCN
MYD88
NF1
NF2
NFE2L2
NFKBIA
NKX2-1
NOTCH1
NOTCH2
NOTCH3
NPM1
NRAS
NSD1
NTRK1
NTRK2
NTRK3
NUP93
PAK3
PALB2
PARK2
PAX5
PBRM1
PDCD1LG2
PDGFRA
PDGFRB
PDK1
PIK3C2B
PIK3CA
PIK3CB
PIK3CG
PIK3R1
PIK3R2
PLCG2
PMS2
POLD1
POLE
PPP2R1A
PRDM1
PREX2
PRKAR1A
PRKCI
PRKDC
PRSS8
PTCH1
PTEN
PTPN11
QKI
RAC1
RAD50
RAD51
RAF1
RANBP2
RARA
RB1
RBM10
RET
RICTOR
RNF43
ROS1
RPTOR
RUNX1
RUNX1T1
SDHA
SDHB
SDHC
SDHD
SETD2
SF3B1
SLIT2
SMAD2
SMAD3
SMAD4
SMARCA4
SMARCB1
SMO
SNCAIP
SOCS1
SOX10
SOX2
SOX9
SPEN
SPOP
SPTA1
SRC
STAG2
STAT3
STAT4
STK11
SUFU
SYK
TAF1
TBX3
TERC
TERT
TET2
TGFBR2
TNFAIP3
TNFRSF14
TOP1
TOP2A
TP53
TSC1
TSC2
TSHR
U2AF1
VEGFA
VHL
WISP3
WT1
XPO1
ZBTB2
ZNF217
ZNF703
BCR
ETV1
ETV4
ETV5
ETV6
MYB
TMPRSS2

## Sheet: Table S1B (PGDx R203 Genes)
ABL1
ACVR1
AKT1
AKT2
ALK
APC
AR
ARID1A
ARID1B
ASXL1
ATM
ATRX
AURKA
AXIN2
BAP1
BCL2
BCR
BLM
BMPR1A
BRAF
BRCA1
BRCA2
BRIP1
BTK
BUB1B
CALR
CBL
CCND1
CCNE1
CDC73
CDH1
CDK4
CDK6
CDKN1B
CDKN2A
CDKN2B
CDKN2C
CEBPA
CHEK2
CIC
CREBBP
CSF1R
CTNNB1
CYLD
DAXX
DDB2
DDR2
DICER1
DNAJB1
DNMT3A
EGFR
EP300
ERBB2
ERBB3
ERBB4
ERCC1
ERCC2
ERCC3
ERCC4
ERCC5
ESR1
ETV1
ETV4
ETV5
ETV6
EWSR1
EXT1
EXT2
EZH2
FANCA
FANCB
FANCC
FANCD2
FANCE
FANCF
FANCG
FANCI
FANCL
FANCM
FBXW7
FGFR1
FGFR2
FGFR3
FGFR4
FH
FLCN
FLT3
FLT4
FOXL2
GATA1
GATA2
GNA11
GNAQ
GNAS
GPC3
H3F3A
H3F3B
HNF1A
HRAS
IDH1
IDH2
IGF1R
IGF2R
IKZF1
JAK1
JAK2
JAK3
KDR
KIT
KRAS
MAML1
MAP2K1
MAP2K4
MDM2
MDM4
MED12
MEN1
MET
MLH1
MLL
MPL
MSH2
MSH6
MTOR
MUTYH
MYC
MYCL1
MYCN
MYD88
NBN
NCOA3
NF1
NF2
NKX2-1
NOTCH1
NOTCH2
NOTCH3
NOTCH4
NPM1
NRAS
NTRK1
PALB2
PAX5
PBRM1
PDGFRA
PDGFRB
PHOX2B
PIK3CA
PIK3R1
PMS1
PMS2
POLD1
POLE
POLH
POT1
PRKACA
PRKAR1A
PRSS1
PTCH1
PTEN
PTPN11
RAD51C
RAF1
RARA
RB1
RECQL4
RET
RNF43
ROS1
RUNX1
SBDS
SDHAF2
SDHB
SDHC
SDHD
SF3B1
SMAD2
SMAD3
SMAD4
SMARCB1
SMO
SRC
STAG2
STK11
SUFU
TACC3
TERT
TET2
TGFBR2
TMPRSS2
TNFAIP3
TOP1
TP53
TSC1
TSC2
TSHR
VHL
WAS
WRN
WT1
XPA
XPC
XRCC1

## Sheet: Table S1C (Caris IHC Proteins)
ALK
cMET
HER2
PTEN
PD-1
PD-L1
ERCC1
TS
RRM1
TLE3
TUBB3
TOPO1
PGP
MLH1
PMS2
MSH2
MSH6

## Sheet: Table S1D (NeoGenomics IHC)
ALK
HER2
PD-L1
ERCC1
TS
MLH1
PMS2
MSH2
MSH6

## Sheet: Table S1E (RPPA Proteins)
Protein	Phospho Site
EGFR	NA
EGFR	Y1068
HER2	NA
HER2	Y1248
HER3	NA
HER3	Y1289
MEK	S217/S221
ERK	T202/Y204
AKT	T308
AKT	S473
mTOR	S2448
S6	S235/S236
4EBP1	T37/T46
4EBP1	S65
ALK	Y1604
VEGFR2	Y951
MET	Y1234/Y1235
FGFR1	Y653/Y654
SRC	Y416
STAT3	Y705
JAK2	Y1007/Y1008

## Sheet: Table S2A (Actionable Markers)
MARKER	CONDITION	ASSAY	IMPLICATION	ACTIONABILITY
BRCA1	Path	NGS	Off label or clinical trial of a PARP inhibitor	Highly Actionable
BRCA2	Path	NGS	Off label or clinical trial of a PARP inhibitor	Highly Actionable
PALB2	Path	NGS	Off label or clinical trial of a PARP inhibitor	Highly Actionable
BARD1	Path	NGS	Off label or clinical trial of a PARP inhibitor	Modifies Options
BAP1	Path	NGS	Off label or clinical trial of a PARP inhibitor	Modifies Options
SMARCA4	Path	NGS	Off label or clinical trial of a PARP inhibitor	Modifies Options
EMSY	Path	NGS	Off label or clinical trial of a PARP inhibitor	Modifies Options
CHEK2	Path	NGS	Off label or clinical trial of a PARP inhibitor	Highly Actionable
ATM	Path	NGS	Off label or clinical trial of a PARP inhibitor	Highly Actionable
FANCA	Path	NGS	Off label or clinical trial of a PARP inhibitor	Highly Actionable
FANCC	Path	NGS	Off label or clinical trial of a PARP inhibitor	Highly Actionable
PTEN	Path	NGS	Off label or clinical trial of a PARP inhibitor	Null
BRIP1	Path	NGS	Off label or clinical trial of a PARP inhibitor	Modifies Options
STAG2	Path	NGS	Off label or clinical trial of a PARP inhibitor	Modifies Options
RAD50	Path	NGS	Off label or clinical trial of a PARP inhibitor	Modifies Options
CHEK1	Path	NGS	Off label or clinical trial of a PARP inhibitor	Highly Actionable
STK11	Path	NGS	Off label or clinical trial of an mTOR/AKT inhibitor	Highly Actionable
PTEN	Path	NGS	Off label or clinical trial of an mTOR/AKT inhibitor	Null
AKT1	Path	NGS	Off label or clinical trial of an mTOR/AKT inhibitor	Highly Actionable
AKT2	Path	NGS	Off label or clinical trial of an mTOR/AKT inhibitor	Highly Actionable
AKT3	Path	NGS	Off label or clinical trial of an mTOR/AKT inhibitor	Highly Actionable
ARID1A	Path	NGS	Off label or clinical trial of an mTOR/AKT inhibitor	Modifies Options
PIK3CA	Path	NGS	Off label or clinical trial of an mTOR/AKT inhibitor	Modifies Options
PIK3CB	Path	NGS	Off label or clinical trial of an mTOR/AKT inhibitor	Modifies Options
PIK3CG	Path	NGS	Off label or clinical trial of an mTOR/AKT inhibitor	Modifies Options
PIK3R2	Path	NGS	Off label or clinical trial of an mTOR/AKT inhibitor	Modifies Options
FBXW7	Path	NGS	Off label or clinical trial of an mTOR/AKT inhibitor	Modifies Options
TSC1	Path	NGS	Off label or clinical trial of an mTOR/AKT inhibitor	Highly Actionable
TSC2	Path	NGS	Off label or clinical trial of an mTOR/AKT inhibitor	Highly Actionable
PREX2	Path	NGS	Off label or clinical trial of an mTOR/AKT inhibitor	Null
PTEN	Negative	IHC	Off label or clinical trial of an mTOR/AKT inhibitor	Null
CDKN2A	Path	NGS	Off label or clinical trial of a CDK inhibitor	Null
CDKN2B	Path	NGS	Off label or clinical trial of a CDK inhibitor	Null
CCND1	Path	NGS	Off label or clinical trial of a CDK inhibitor	Modifies Options
CCND2	Path	NGS	Off label or clinical trial of a CDK inhibitor	Modifies Options
CCND3	Path	NGS	Off label or clinical trial of a CDK inhibitor	Modifies Options
CCNE1	Path	NGS	Off label or clinical trial of a CDK inhibitor	Modifies Options
CDK4	Path	NGS	Off label or clinical trial of a CDK inhibitor	Highly Actionable
CDK6	Path	NGS	Off label or clinical trial of a CDK inhibitor	Highly Actionable
MYC	Path	NGS	Off label or clinical trial of a CDK inhibitor	Null
MYCL1	Path	NGS	Off label or clinical trial of a CDK inhibitor	Null
MYCN	Path	NGS	Off label or clinical trial of a CDK inhibitor	Null
MEN1	Path	NGS	Off label or clinical trial of a CDK inhibitor	Null
PARK2	Path	NGS	Off label or clinical trial of a CDK inhibitor	Null
FGF3	Path	NGS	Off label or clinical trial of an FGFR inhibitor	Null
FGF4	Path	NGS	Off label or clinical trial of an FGFR inhibitor	Null
FGF6	Path	NGS	Off label or clinical trial of an FGFR inhibitor	Null
FGF19	Path	NGS	Off label or clinical trial of an FGFR inhibitor	Null
FGF23	Path	NGS	Off label or clinical trial of an FGFR inhibitor	Null
FGFR1	Path	NGS	Off label or clinical trial of an FGFR inhibitor	Highly Actionable
FGFR4	Path	NGS	Off label or clinical trial of an FGFR inhibitor	Highly Actionable
FRS2	Path	NGS	Off label or clinical trial of an FGFR inhibitor	Modifies Options
MET	Path	NGS	Off label or clinical trial of a c-MET inhibitor	Modifies Options
HGF	Path	NGS	Off label or clinical trial of a c-MET inhibitor	Null
MET	Amplified	ISH	Off label or clinical trial of a c-MET inhibitor	Modifies Options
KRAS	Path	NGS	Off label or clinical trial of a MEK inhibitor	Null
GNAS	Path	NGS	Off label or clinical trial of a MEK inhibitor	Null
GNAQ	Path	NGS	Off label or clinical trial of a MEK inhibitor	Modifies Options
GNA11	Path	NGS	Off label or clinical trial of a MEK inhibitor	Modifies Options
NF1	Path	NGS	Off label or clinical trial of a MEK inhibitor	Null
RAF1	Path	NGS	Off label or clinical trial of a MEK inhibitor	Null
BRAF	Path	NGS	Off label or clinical trial of a MEK inhibitor	Highly Actionable
RNF43	Path	NGS	Clinical trial of a WNT inhibitor	Modifies Options
CTNNB1	Path	NGS	Clinical trial of a WNT inhibitor	Modifies Options
GNAS	Path	NGS	Clinical trial of a WNT inhibitor	Modifies Options
ERBB2	Path	NGS	Off label or clinical trial of a HER2-targeting agent	Highly Actionable
HER2	Amplified	ISH	Off label or clinical trial of a HER2-targeting agent	Highly Actionable
HER2	Positive	IHC	Off label or clinical trial of a HER2-targeting agent	Highly Actionable
RET	Path	NGS	Off label or clinical trial of a Ret-targeting agent	Highly Actionable
NTRK1	Path	NGS	Clinical trial of a Trk inhibitor	Highly Actionable
NTRK3	Path	NGS	Clinical trial of a Trk inhibitor	Highly Actionable
MYD88	Path	NGS	Off label or clinical trial of ibrutinib	Null
TOP2A	Path	NGS	Anthracycline-based therapy	Highly Actionable
TOP2A	Amplified	ISH	Anthracycline-based therapy	Highly Actionable
CRKL	Path	NGS	Off label treatment with a Src inhibitor	Null
BRAF	V600E	NGS	Off label treatment with vemurafenib or dabrafenib plus trametinib	Highly Actionable
ALK	Path	NGS	Off label or clinical trial of an ALK inhibitor	Highly Actionable
ALK	Positive	IHC	Off label or clinical trial of an ALK inhibitor	Null
KIT	Path	NGS	Off label treatment with a cKIT/PDGFR-targeting agent	Modifies Options
PDGFRA	Path	NGS	Off label treatment with a cKIT/PDGFR-targeting agent	Modifies Options
ROS1	Path	NGS	Off label or clinical trial of a ROS1 inhibitor	Highly Actionable
POLD1	Path	NGS	Clinical trial of an immunotherapy or vaccine	Modifies Options
POLE	Path	NGS	Clinical trial of an immunotherapy or vaccine	Modifies Options
MUTYH	Path	NGS	Clinical trial of an immunotherapy or vaccine	Modifies Options
MLH1	Negative	IHC	Clinical trial of an immunotherapy or vaccine	Highly Actionable
PMS2	Negative	IHC	Clinical trial of an immunotherapy or vaccine	Highly Actionable
MSH2	Negative	IHC	Clinical trial of an immunotherapy or vaccine	Highly Actionable
MSH6	Negative	IHC	Clinical trial of an immunotherapy or vaccine	Highly Actionable
PD-1	Positive	IHC	Clinical trial of an immunotherapy or vaccine	Null
PD-L1	Positive	IHC	Clinical trial of an immunotherapy or vaccine	Modifies Options
TS	Negative	IHC	5-Fluorouracil-based therapy	Null
TOP1	Positive	IHC	Irinotecan-based therapy	Null
ERCC1	Negative	IHC	Platinum-based therapy	Null
RRM1	Negative	IHC	Gemcitabine-based therapy	Null

## Sheet: TableS2B (Actionable Drugs)
MARKER	DRUG	DRUG STATUS
AKT1	everolimus; temsirolimus	FDA approved
	MK2206; ARQ 092; AZD5363; GSK2141795; ONC201; sapanisertib	investigational
AKT2	everolimus; temsirolimus	FDA approved
	MK2206; ARQ 092; AZD5363; GSK2141795; ONC201; sapanisertib	investigational
AKT3	everolimus; temsirolimus	FDA approved
	MK2206; ARQ 092; AZD5363; GSK2141795; ONC201; sapanisertib	investigational
ALK	alectinib; ceritinib; crizotinib; brigatinib	FDA approved
	ensartinib; lorlatinib; entrectinib	investigational
ATM	olaparib; niraparib; rucaparib	FDA approved
	fluzoparib; simmiparib; talazoparib; veliparib	investigational
BRAF	dabrafenib; encorafenib; vemurafenib; trametinib; binimetinib; cobimetinib	FDA approved
	PLX8394; PD-0325901; selumetinib; MK-8353; GDC-0994; LY3214996; ulixertinib	investigational
BRCA1	olaparib; niraparib; rucaparib	FDA approved
	fluzoparib; simmiparib; talazoparib; veliparib	investigational
BRCA2	olaparib; niraparib; rucaparib	FDA approved
	fluzoparib; simmiparib; talazoparib; veliparib	investigational
CDK4	ribociclib; abemaciclib; palbociclib	FDA approved
	SHR6390; trilaciclib; AT7519	investigational
CDK6	ribociclib; abemaciclib; palbociclib	FDA approved
	SHR6390; trilaciclib; AT7519	investigational
CHEK1	olaparib; niraparib; rucaparib	FDA approved
	fluzoparib; simmiparib; talazoparib; veliparib	investigational
CHEK2	olaparib; niraparib; rucaparib	FDA approved
	fluzoparib; simmiparib; talazoparib; veliparib	investigational
ERBB2	lapatinib; pertuzumab; trastuzumab; neratinib; ado-trastuzumab emtansine	FDA approved
	tucatinib; ZW25; GBR 1302; pyrotinib; dacomitinib; margetuximab; MCLA-128; MEDI4276; poziotinib	investigational
FANCA	olaparib; niraparib; rucaparib	FDA approved
	fluzoparib; simmiparib; talazoparib; veliparib	investigational
FANCC	olaparib; niraparib; rucaparib	FDA approved
	fluzoparib; simmiparib; talazoparib; veliparib	investigational
FANCG	olaparib; niraparib; rucaparib	FDA approved
	fluzoparib; simmiparib; talazoparib; veliparib	investigational
FGFR1	pazopanib; ponatinib; lenvatinib; regorafenib	FDA approved
	sulfatinib; AZD4547; TAS-120; Debio 1347; infigratinib; dovitinib; anlotinib	investigational
FGFR2	pazopanib; ponatinib; lenvatinib; regorafenib	FDA approved
	AZD4547; TAS-120; Debio 1347; infigratinib; rogaratinib; anlotinib	investigational
FGFR3	pazopanib; ponatinib; lenvatinib; regorafenib	FDA approved
	AZD4547; TAS-120; Debio 1347; infigratinib; rogaratinib; dovitinib; anlotinib	investigational
FGFR4	ponatinib	FDA approved
	FGF401; BLU554; BLU9931; rogaratinib	investigational
IDH1	ivosidenib; IDH305; BAY1436032; AG-881	investigational
MLH1 PMS2 MSH2 MSH6	nivolumab; pembrolizumab; atezolizumab; avelumab	FDA approved
NTRK1	cabozantinib	FDA approved
	AZD7451; larotrectinib; PLX7486; LOXO-195; merestinib; entrectinib; sitravatinib	investigational
NTRK3	cabozantinib	FDA approved
	AZD7451; larotrectinib; PLX7486; LOXO-195; merestinib; entrectinib; sitravatinib	investigational
PALB2	olaparib; niraparib; rucaparib	FDA approved
	fluzoparib; simmiparib; talazoparib; veliparib	investigational
RET	cabozantinib; vandetanib; sunitinib; sorafenib; lenvatinib; regorafenib	FDA approved
	LOXO-292; motesanib; blu-667; entrectinib; sitravatinib	investigational
ROS1	crizotinib	FDA approved
	DS-6051b; lorlatinib; TPX-0005; entrectinib	investigational
STK11	everolimus; temsirolimus	FDA approved
	sapanisertib	investigational
TSC1	everolimus; temsirolimus	FDA approved
	sapanisertib	investigational
TSC2	everolimus; temsirolimus	FDA approved
	sapanisertib	investigational

## Sheet: TableS2C (Actionable Refs)
MARKER	DRUG	FDA Approved	PMID/ASCO Abstract ID	STUDY_TYPE	TRIAL_PHASE	TRIAL_SIZE	NCT_ID	N_RESPONDERS	DISEASE
AKT1, AKT2, AKT3	AZD5363	N	28489509	non-randomized clinical trial	N/A	52	NCT01226316	9	Multiple
	AZD5363	N	28376212	Case report	N/A	N/A	N/A	1	Meningioma
	ARQ 092	N	ASCO, 2017	non-randomized clinical trial	Ib	13	NCT02476955	2	Ovarian
Alk	crizotinib	Y	25470694	randomized clinical trial	phase 3	343	NCT01154140	128	NSCLC
ATM	olaparib	Y	26510020	non-randomized clinical trial	phase 2	6	NCT01682772	4	prostate
BRAF	vemurafenib	Y	24508103	randomized clinical trial	phase 3	675	NCT01006980	192	melanoma
	dabrafenib	Y	22735384	randomized clinical trial	phase 3	250	NCT01227889	93	melanoma
BRCA1/2	olaparib	Y	24882434	randomized clinical trial	phase 2	265	NCT00753545	maintenance	ovarian
	niraparib	Y	27717299	randomized clinical trial	phase 3	203	NCT01847274	maintenance	ovarian
	rucaparib	Y	27908594	non-randomized clinical trial	phase 2	40	NCT01891344	32	ovarian
	AZD1775	N	25964244	non-randomized clinical trial	phase 1	25	NCT01748825	2	refractory solid
CDK4/6	palbociclib	Y	23569312	randomized clinical trial	phase 2	29	NCT01209598	1	liposarcoma
CHEK1, CHEK2	Olaparib	Y	28082821	case report	N/A	1	N/A	1	colorectal
	Olaparib	Y	26510020	non-randomized clinical trial	N/A	2	N/A	1	prostate
ERBB2	trastuzumab		11821453	randomized clinical trial	phase 3	114	N/A	30	breast
FANCA, FANCC, FANCG	mitomycin	Y	26848151	non-randomized clinical trial	phase I	61	NCT01017640	6	multiple
FGFR1, FGFR2, FGFR3, FGFR4	dovitinib	N	23658459	non-randomized clinical trial	N/A	81	N/A	5	breast
	AZD4547	N	27179038	non-randomized clinical trial	phase 2	17	NCT01795768	1	breast
	BGJ398	N	27870574	non-randomized clinical trial	phase 1/2	132	NCT01004224	3	squamous NSCLC
IDH1	ivosidenib	N	ASH 2017	non-randomized clinical trial	phase 1	125	NCT02074839	52	AML
MLH1 PMS2 MSH2 MSH6	pembrolizumab	Y	26028255	non-randomized clinical trial	phase 2	10	NCT01876511	4	colorectal
	nivolumab	Y	28734759	non-randomized clinical trial	phase 2	74	NCT02060188	23	colorectal
NTRK1, NTRK3	entrectinib	N	26563355	case study	N/A	N/A	N/A	1	colorectal
	entrectinib	N	26565381	case study	N/A	N/A	N/A	1	NSCLC
	larotrectinib	N	29466156	non-randomized clinical trial	phase 1/2	55	NCT02576431	41	solid tumors
PALB2	Olaparib	Y	26510020	non-randomized clinical trial	N/A	2	N/A	2	prostate
RET	cabozantinib	Y	27825636	non-randomized clinical trial	phase 2	25	NCT01639508	7	NSCLC
ROS1	crizotinib	Y	25264305	non-randomized clinical trial	phase 1	50	NCT00585195	36	NSCLC
	crizotinib	Y	25667280	retrospective study	N/A	30	N/A	24	NSCLC
STK11	everolimus	Y	21189378	case study	N/A	N/A	N/A	1	pancreatic
	everolimus	Y	28550065	case study	N/A	N/A	N/A	1	breast
TSC1	everolimus	Y	26859683	retrospective sequencing	N/A	39	N/A	3	thyroid; sarcoma; renal
	everolimus	Y	22923433	non-randomized clinical trial	phase 2	45	NCT00805129	1	bladder
TSC2	everolimus	Y	26859683	retrospective sequencing	N/A	39	N/A	1	gastric

## Sheet: Table S3 (Frequency Comparison)
Gene	KYT_Variants	KYT_Freq	Other_Freq	Other_Data	Pval	Qval
ABL1	Path+VUS	0.023	0.003	QCMG	0.011	0.047
ALK	Path+VUS	0.044	0.003	QCMG	5e-05	0.0006
APC	Path+VUS	0.089	0.013	QCMG	2e-07	9e-06
APC	Path+VUS	0.089	0	ICGC	0.0003	0.025
AR	Path+VUS	0.042	0	QCMG	5e-06	0.0001
ARAF	Path+VUS	0.021	0	QCMG	0.002	0.014
ARID1B	Path+VUS	0.109	0.005	QCMG	2e-12	8e-10
ARID1B	Path+VUS	0.109	0.007	TCGA	6e-06	0.0008
ARID1B	Path+VUS	0.109	0	UTSW	2e-05	0.002
ARID1B	Path+VUS	0.109	0.01	ICGC	0.0006	0.038
ASXL1	Path+VUS	0.037	0.003	QCMG	0.0002	0.002
ATM	Path+VUS	0.124	0.037	QCMG	1e-06	5e-05
ATM	Path+VUS	0.124	0.018	UTSW	0.0003	0.024
ATM	Path+VUS	0.124	0.033	TCGA	0.0008	0.048
ATR	Path+VUS	0.035	0.005	QCMG	0.002	0.011
AXIN1	Path+VUS	0.023	0	QCMG	0.002	0.014
BARD1	Path+VUS	0.051	0.008	QCMG	0.0002	0.002
BLM	Path+VUS	0.048	0	QCMG	9e-07	3e-05
BRAF	Path+VUS	0.033	0.005	QCMG	0.003	0.015
BRCA1	Path+VUS	0.052	0.013	QCMG	0.001	0.009
BRCA2	Path+VUS	0.11	0.021	QCMG	5e-08	5e-06
BRCA2	Path+VUS	0.11	0.013	TCGA	4e-05	0.003
BRCA2	Path+VUS	0.11	0	ICGC	4e-05	0.006
BRCA2	Path+VUS	0.11	0.009	UTSW	0.0002	0.022
BRD4	Path+VUS	0.023	0	QCMG	0.002	0.015
BRIP1	Path+VUS	0.037	0	QCMG	2e-05	0.0003
CBL	Path+VUS	0.026	0.003	QCMG	0.004	0.02
CDKN2A	Path+VUS	0.344	0.02	ICGC	1e-13	2e-11
CDKN2A	Path+VUS	0.344	0.055	UTSW	4e-11	1e-08
CDKN2A	Path	0.281	0.02	ICGC	2e-10	2e-08
CDKN2A	Path+VUS	0.344	0.185	QCMG	2e-07	1e-05
CDKN2A	Path	0.281	0.055	UTSW	7e-08	2e-05
CDKN2A	Path+VUS	0.344	0.147	TCGA	2e-06	0.0004
CDKN2A	Path	0.281	0.147	TCGA	0.0007	0.048
CHEK2	Path+VUS	0.035	0	QCMG	3e-05	0.0005
CIC	Path+VUS	0.035	0.005	QCMG	0.002	0.011
CREBBP	Path+VUS	0.074	0.01	QCMG	2e-06	5e-05
CSF1R	Path+VUS	0.046	0.003	QCMG	3e-05	0.0004
DNMT3A	Path+VUS	0.028	0	QCMG	0.0004	0.003
DOT1L	Path+VUS	0.04	0.003	QCMG	8e-05	0.0009
EGFR	Path+VUS	0.025	0	QCMG	0.001	0.009
EP300	Path+VUS	0.044	0.008	QCMG	0.0007	0.006
EPHA3	Path+VUS	0.026	0	QCMG	0.0007	0.005
ERBB3	Path+VUS	0.033	0.005	QCMG	0.003	0.016
ESR1	Path+VUS	0.033	0	QCMG	6e-05	0.0007
FANCA	Path+VUS	0.049	0.003	QCMG	8e-06	0.0002
FANCC	Path+VUS	0.019	0	QCMG	0.004	0.021
FANCF	Path+VUS	0.025	0	QCMG	0.001	0.009
FANCG	Path+VUS	0.018	0	QCMG	0.007	0.032
FANCL	Path+VUS	0.018	0	QCMG	0.007	0.032
FAT1	Path+VUS	0.101	0.018	QCMG	1e-07	1e-05
FAT1	Path+VUS	0.101	0.01	ICGC	0.0009	0.041
FGFR3	Path+VUS	0.03	0.003	QCMG	0.002	0.015
FGFR4	Path+VUS	0.026	0.003	QCMG	0.004	0.02
FLT1	Path+VUS	0.051	0.01	QCMG	0.0005	0.004
FLT3	Path+VUS	0.018	0	QCMG	0.007	0.031
FLT4	Path+VUS	0.039	0.008	QCMG	0.003	0.017
GATA2	Path+VUS	0.03	0	QCMG	0.0002	0.002
GNAS	Path+VUS	0.104	0.026	QCMG	3e-06	7e-05
GNAS	Path+VUS	0.104	0.01	ICGC	0.0009	0.045
HSP90AA1	Path+VUS	0.028	0	QCMG	0.0004	0.003
IGF1R	Path+VUS	0.019	0	QCMG	0.004	0.02
IKBKE	Path+VUS	0.023	0	QCMG	0.002	0.014
IRS2	Path+VUS	0.058	0.01	QCMG	0.0001	0.001
JAK2	Path+VUS	0.032	0	QCMG	0.0001	0.001
KAT6A	Path+VUS	0.041	0	QCMG	1e-05	0.0002
KDR	Path+VUS	0.049	0.003	QCMG	8e-06	0.0001
KEAP1	Path+VUS	0.034	0.003	QCMG	0.0007	0.006
KEL	Path+VUS	0.037	0.008	QCMG	0.005	0.024
KMT2A	Path+VUS	0.039	0.008	QCMG	0.003	0.017
KMT2C	Path	0.002	0.055	QCMG	5e-08	1e-05
KMT2C	Path	0.002	0.064	UTSW	2e-05	0.001
KMT2C	Path+VUS	0.079	0	TCGA	3e-05	0.003
KMT2C	Path	0.002	0.061	ICGC	6e-05	0.004
KMT2D	Path+VUS	0.1	0	TCGA	1e-06	0.0006
KMT2D	Path+VUS	0.1	0	ICGC	0.0001	0.012
KMT2D	Path+VUS	0.1	0.05	QCMG	0.005	0.023
LRP1B	Path+VUS	0.14	0.057	QCMG	4e-05	0.0005
MAP3K1	Path+VUS	0.081	0.005	QCMG	8e-09	2e-06
MAP3K1	Path+VUS	0.081	0.007	TCGA	0.0003	0.019
MAP3K1	Path+VUS	0.081	0	UTSW	0.0005	0.035
MAP3K1	Path+VUS	0.081	0	ICGC	0.0008	0.048
MED12	Path+VUS	0.049	0.016	QCMG	0.007	0.03
MET	Path+VUS	0.03	0.003	QCMG	0.002	0.015
MLH1	Path+VUS	0.019	0	QCMG	0.004	0.02
MPL	Path+VUS	0.023	0	QCMG	0.002	0.014
MSH6	Path+VUS	0.028	0	QCMG	0.0004	0.003
MUTYH	Path+VUS	0.025	0.003	QCMG	0.007	0.03
NF1	Path	0.005	0.073	UTSW	4e-05	0.002
NF1	Path+VUS	0.039	0.01	QCMG	0.008	0.034
NOTCH1	Path+VUS	0.067	0.005	QCMG	5e-07	2e-05
NOTCH2	Path+VUS	0.049	0.01	QCMG	0.0008	0.006
NOTCH3	Path+VUS	0.044	0	QCMG	3e-06	7e-05
NSD1	Path+VUS	0.046	0	QCMG	2e-06	5e-05
NTRK1	Path+VUS	0.058	0.008	QCMG	2e-05	0.0003
NUP93	Path+VUS	0.028	0.003	QCMG	0.002	0.015
PALB2	Path+VUS	0.049	0.005	QCMG	4e-05	0.0006
PARK2	Path+VUS	0.03	0.003	QCMG	0.002	0.014
PDGFRB	Path+VUS	0.044	0.005	QCMG	0.0002	0.002
PIK3C2B	Path+VUS	0.037	0.008	QCMG	0.005	0.024
PIK3CG	Path+VUS	0.04	0.01	QCMG	0.005	0.024
PIK3R2	Path+VUS	0.032	0.003	QCMG	0.001	0.009
POLE	Path+VUS	0.079	0.013	QCMG	2e-06	6e-05
PRDM1	Path+VUS	0.018	0	QCMG	0.007	0.031
PREX2	Path+VUS	0.066	0.018	QCMG	0.0005	0.004
PRKDC	Path+VUS	0.08	0.005	QCMG	1e-08	2e-06
PTCH1	Path+VUS	0.039	0.003	QCMG	0.0001	0.001
RAD50	Path+VUS	0.028	0	QCMG	0.0004	0.003
RANBP2	Path+VUS	0.047	0.01	QCMG	0.001	0.009
ROS1	Path+VUS	0.054	0.008	QCMG	6e-05	0.0007
RPTOR	Path+VUS	0.032	0.005	QCMG	0.005	0.023
SDHC	Path+VUS	0.018	0	QCMG	0.007	0.031
SETD2	Path+VUS	0.065	0.023	QCMG	0.003	0.017
SPEN	Path+VUS	0.07	0.005	QCMG	1e-07	1e-05
SPTA1	Path+VUS	0.087	0.021	QCMG	1e-05	0.0002
STAG2	Path+VUS	0.018	0	QCMG	0.007	0.031
STK11	Path+VUS	0.051	0.008	QCMG	0.0002	0.002
TET2	Path+VUS	0.042	0	QCMG	5e-06	0.0001
TNFAIP3	Path+VUS	0.025	0.003	QCMG	0.007	0.03
TP53	Path+VUS	0.752	0.333	ICGC	2e-15	8e-13
TP53	Path	0.746	0.333	ICGC	7e-15	1e-12
TP53	Path+VUS	0.752	0.505	UTSW	5e-07	0.0001
TP53	Path	0.746	0.505	UTSW	1e-06	0.0001
TP53	Path+VUS	0.752	0.661	QCMG	0.003	0.015
TSC1	Path+VUS	0.039	0	QCMG	2e-05	0.0003
TSC2	Path+VUS	0.075	0.008	QCMG	2e-07	1e-05
TSC2	Path+VUS	0.075	0	UTSW	0.0008	0.047
TSHR	Path+VUS	0.025	0	QCMG	0.001	0.009
ZNF217	Path+VUS	0.035	0	QCMG	3e-05	0.0005
ZNF703	Path+VUS	0.045	0.005	QCMG	0.0002	0.002
